# Supplementary material for: High-fat diet feeding differentially affects the development of inflammation in the central nervous system
Source: Springer Nature journal article supplement (doi:10.1186/s12974-016-0666-8), 2016-08-26
Supplement: MOESM1 [file 10625012]

**Table S1. Composition of the diets used in the diet-induced obesity model**

Nutrient percentage (of weight (g)) provided by fat, carbohydrates and proteins as well as fatty acid composition of the diets according to the manufacturer.

| <b>% gm</b>               | <b>CTL diet<br/>(AIN-93M)</b> | <b>High fat diet<br/>(D12492)</b> |
|---------------------------|-------------------------------|-----------------------------------|
| Fat                       | 4                             | 35                                |
| Carbohydrates             | 73.1                          | 26                                |
| Proteins                  | 14.2                          | 26                                |
| <b>Fatty acid profile</b> |                               |                                   |
| Saturated (g)             | 5.7                           | 81.5                              |
| Monounsaturated (g)       | 9.7                           | 91.5                              |
| Polyunsaturated (g)       | 24.5                          | 81.5                              |

**Table S2. High-fat diet-induced changes in phospholipid and lysophospholipid cortical levels**

| CORTEX            | acyl chain(s) | head group |            |            |              |
|-------------------|---------------|------------|------------|------------|--------------|
|                   |               | Choline    | Inositol   | Glycerol   | Ethanolamine |
|                   |               |            |            |            |              |
| Phospholipids     | 34:1          | 90 ± 6     | N.D.       | 96 ± 21    | 150 ± 20     |
|                   | 36:1          | 112 ± 3 ** | 194 ± 15 * | 165 ± 47   | 153 ± 13     |
|                   | 36:2          | 124 ± 11   | 229 ± 47*  | N.D.       | 149 ± 24     |
|                   | 38:4          | 114 ± 13   | 185 ± 13 * | 105 ± 18   | 153 ± 25     |
|                   | 38:5          | 82 ± 9     | 153 ± 11   | 61 ± 21    | 144 ± 25     |
|                   | 40:5          | 97 ± 12    | 219 ± 39   | N.D.       | 101 ± 25     |
| Lysophospholipids | 14:0          | N.D.       | N.D.       | 121 ± 13   | 100 ± 11     |
|                   | 16:0          | 137 ± 22   | 156 ± 11   | 151 ± 6    | 116 ± 13     |
|                   | 16:1          | 105 ± 28   | N.D.       | N.D.       | 84 ± 7       |
|                   | 18:0          | 217 ± 42 * | 169 ± 19 * | 233 ± 28 * | 136 ± 28     |
|                   | 18:1          | 167 ± 27 * | 137 ± 9    | 125 ± 6    | 113 ± 15     |
|                   | 18:2          | N.D.       | N.D.       | N.D.       | 205 ± 21 *   |
|                   | 20:4          | 101 ± 20   | 141 ± 11   | 139 ± 19   | 121 ± 13     |
|                   | 22:6          | 144 ± 24   | 188 ± 67   | 123 ± 9    | 125 ± 15     |

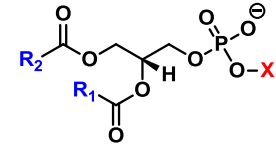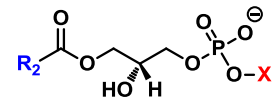

HPLC-MS relative quantification of phospholipids and lysophospholipids in the cortex of high-fat diet fed-mice and control diet-fed mice at week 16. The levels in control mice were set at 100%. Data are mean ± s.e.m. One way ANOVA with Bonferroni's post-test or Kruskal-Wallis test with Dunns post-test \*P<0.05 and \*\*P<0.01.

**Table S3. High-fat diet-induced changes in phospholipid and lysophospholipid cerebellar levels**

| CEREBELLUM        |               | acyl chain(s) | Head group   |          |          |              |
|-------------------|---------------|---------------|--------------|----------|----------|--------------|
|                   |               |               | Choline      | Inositol | Glycerol | Ethanolamine |
|                   | Phospholipids | 34:1          | 94 ± 1       | 137 ± 30 | 137 ± 30 | 121 ± 17     |
| 36:1              |               | 100 ± 2       | 118 ± 27     | 118 ± 26 | 130 ± 11 |              |
| 36:2              |               | 113 ± 3       | 120 ± 20     | N.D.     | 106 ± 14 |              |
| 38:4              |               | 100 ± 3       | 120 ± 21     | 111 ± 24 | 108 ± 12 |              |
| 38:5              |               | 93 ± 4        | 112 ± 14     | 160 ± 45 | 111 ± 18 |              |
| 40:5              |               | 90 ± 2        | 137 ± 27     | N.D.     | 131 ± 16 |              |
| Lysophospholipids | 14:0          | N.D.          | N.D.         | N.D.     | 99 ± 23  |              |
|                   | 16:0          | 96 ± 13       | 186 ± 18 *** | 142 ± 32 | 114 ± 15 |              |
|                   | 16:1          | 106 ± 14      | N.D.         | N.D.     | 87 ± 17  |              |
|                   | 18:0          | 127 ± 30      | 130 ± 14     | 119 ± 22 | 117 ± 17 |              |
|                   | 18:1          | 104 ± 15      | 129 ± 8      | 88 ± 3   | 91 ± 13  |              |
|                   | 18:2          | N.D.          | N.D.         | N.D.     | 149 ± 25 |              |
|                   | 20:4          | 124 ± 15      | 99 ± 10      | 149 ± 25 | 98 ± 14  |              |
|                   | 22:6          | 112 ± 19      | 201 ± 26     | 130 ± 20 | 93 ± 13  |              |

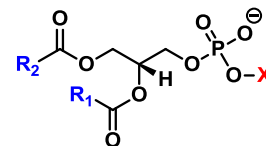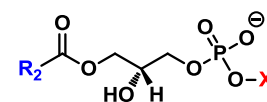

HPLC-MS relative quantification of phospholipids and lysophospholipids in the cerebellum of high-fat diet fed-mice and control diet-fed mice at week 16. The CTL levels were set at 100%. Data are mean ± s.e.m. One way ANOVA with Bonferroni's post-test or Kruskal-Wallis test with Dunns post-test \*\*\*P<0.001

**Table S4. High-fat diet-induced changes in lipid levels**

|                            | CTX         | CBL      |
|----------------------------|-------------|----------|
| <b>N-acylethanolamines</b> |             |          |
| 16:0                       | 180 ± 48 *  | 107 ± 5  |
| 18:1                       | 100 ± 13    | 101 ± 13 |
| 20:4                       | 128 ± 16    | 123 ± 10 |
| <b>CERAMIDES</b>           |             |          |
| 16:0                       | 89 ± 10     | 80 ± 17  |
| 18:0                       | 100 ± 10    | 93 ± 4   |
| 18:1                       | 109 ± 23    | 82 ± 5   |
| 18:2                       | 101 ± 6     | 66 ± 11  |
| 20:0                       | 97 ± 11     | 102 ± 7  |
| 22:0                       | 106 ± 17    | 124 ± 8  |
| 24:0                       | 102 ± 19    | 85 ± 5   |
| 24:1                       | 110 ± 14    | 100 ± 6  |
| <b>DIHYDROCERAMIDES</b>    |             |          |
| 20:0                       | 101 ± 21    | 92 ± 8   |
| 24:0                       | 113 ± 23    | 92 ± 13  |
| 24:1                       | 107 ± 21    | 89 ± 10  |
| <b>Sulfatides</b>          |             |          |
| 18:1-16:0                  | 154 ± 32    | N.D.     |
| 18:1-18:0                  | 88 ± 15     | 99 ± 15  |
| 18:1-18:1                  | N.D.        | N.D.     |
| 18:1-18:2                  | N.D.        | N.D.     |
| 18:1-20:0                  | 209 ± 73    | 66 ± 18  |
| 18:1-22:0                  | 90 ± 25     | 132 ± 11 |
| 18:1-24:0                  | 112 ± 21    | 115 ± 12 |
| 18:1-24:1                  | 98 ± 10     | 127 ± 12 |
| <b>Sphingomyelins</b>      |             |          |
| 18:1-16:0                  | 131 ± 10 ** | 99 ± 5   |
| 18:1-18:0                  | 117 ± 15    | 90 ± 2   |
| 18:1-18:1                  | 122 ± 5     | 102 ± 8  |
| 18:1-18:2                  | N.D.        | N.D.     |
| 18:1-20:0                  | 138 ± 17 *  | 101 ± 3  |
| 18:1-22:0                  | 133 ± 14 *  | 108 ± 3  |
| 18:1-24:0                  | 115 ± 11    | 112 ± 2  |
| 18:1-24:1                  | 125 ± 10    | 102 ± 4  |

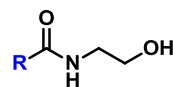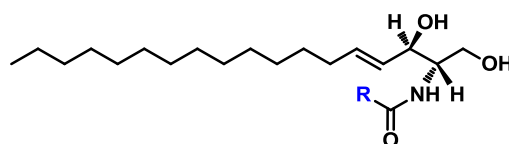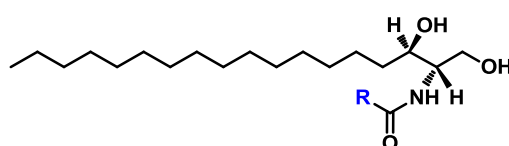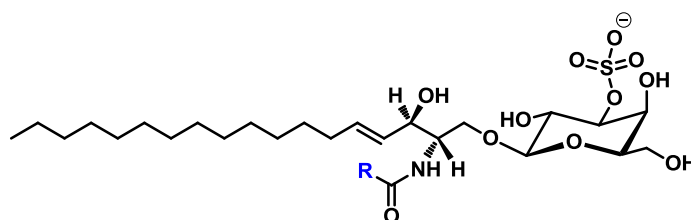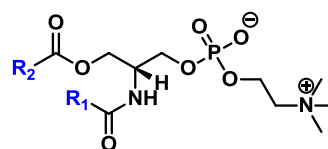

HPLC-MS relative quantification ceramides, dihydroceramides, sulfatides and sphingomyelins in the cortex and the cerebellum of high-fat diet fed-mice and control diet-fed mice at week 16. The CTL levels were set at 100%. Data are mean ± s.e.m. One way ANOVA with Bonferroni's post-test or Kruskal-Wallis test with Dunns post-test \*P<0.05 and \*\*P<0.01
